# Supplementary material
Source: PubMed Central journal article supplement (PMC3365658)

## Calculation of normalized phosphate and carbonate concentrations for precipitation

Assume  $[Ca^{2+}]$ ,  $[Fe^{3+}]$ ,  $[Ba^{2+}]$ , and  $[Ga^{3+}]$  are at unit concentration of 1 M

For  $Ca_3(PO_4)_2 \rightleftharpoons 3Ca^{2+} + 2PO_4^{3-}$  where  $K_{sp} = [Ca^{2+}]^3[PO_4^{3-}]^2$  and  $K_{sp} = 2.07 \text{ E-33}$

then  $2.07 \text{ E-33} = [Ca^{2+}]^3[PO_4^{3-}]^2$

$$2.07 \text{ E-33} = (1)^3[PO_4^{3-}]^2$$

$$2.07 \text{ E-33} = [PO_4^{3-}]^2$$

for  $Ca^{2+}$   $[PO_4^{3-}] = 4.5 \text{ E-17 M}$

Similarly, for  $FePO_4 \rightleftharpoons Fe^{3+} + PO_4^{3-}$  where  $K_{sp} = [Fe^{3+}][PO_4^{3-}]$  and  $K_{sp} = 9.91 \text{ E-16}$

then  $9.91 \text{ E-16} = [Fe^{3+}][PO_4^{3-}]$

$$9.91 \text{ E-16} = (1)[PO_4^{3-}]$$

for  $Fe^{3+}$   $[PO_4^{3-}] = 9.91 \text{ E-16 M}$

and for  $Ba_3(PO_4)_2 \rightleftharpoons 3Ba^{2+} + 2PO_4^{3-}$  where  $K_{sp} = [Ba^{2+}]^3[PO_4^{3-}]^2$  and  $K_{sp} = 3.4 \text{ E-23}$

then  $3.4 \text{ E-23} = [Ba^{2+}]^3[PO_4^{3-}]^2$

$$3.4 \text{ E-23} = (1)^3[PO_4^{3-}]^2$$

$$3.4 \text{ E-23} = [PO_4^{3-}]^2$$

for  $Ba^{2+}$   $[PO_4^{3-}] = 5.8 \text{ E-12 M}$

and for  $GaPO_4 \rightleftharpoons Ga^{3+} + PO_4^{3-}$  where  $K_{sp} = [Ga^{3+}][PO_4^{3-}]$  and  $K_{sp} = 1 \text{ E-21}$

then  $1 \text{ E-21} = [Ga^{3+}][PO_4^{3-}]$

$$1 \text{ E-21} = (1)[PO_4^{3-}]$$

for  $Ga^{3+}$   $[PO_4^{3-}] = 1 \text{ E-21 M}$

The strength of phosphate binding to  $\text{Ca}^{2+}$  and  $\text{Fe}^{3+}$  can be compared by dividing the phosphate concentration required for precipitation with  $\text{Fe}^{3+}$  by that required with  $\text{Ca}^{2+}$ :

$$(9.91 \text{ E-16}/4.5\text{E-17}) = 22$$

Thus, with the same amount of metal present, calcium should bind phosphopeptides 22 times more tightly than iron (III).

Calculations can also be performed to determine the  $[\text{CO}_3^{2-}]$  required for precipitation of the carbonate salts of  $\text{Ca}^{2+}$  and  $\text{Ba}^{2+}$  when assumed to be 1 M:

For  $\text{CaCO}_3 \leftrightarrow \text{Ca}^{2+} + \text{CO}_3^{2-}$  where  $K_{\text{sp}} = [\text{Ca}^{2+}][\text{CO}_3^{2-}]$  and  $K_{\text{sp}} = 3.36 \text{ E-9}$

then  $3.36 \text{ E-9} = [\text{Ca}^{2+}][\text{CO}_3^{2-}]$

$$3.36 \text{ E-9} = (1)[\text{CO}_3^{2-}]$$

$$3.36 \text{ E-9} = [\text{CO}_3^{2-}]$$

$$[\text{CO}_3^{2-}] = 3.36 \text{ E-9 M}$$

and for  $\text{FeCO}_3 \leftrightarrow \text{Fe}^{2+} + \text{CO}_3^{2-}$  where  $K_{\text{sp}} = [\text{Fe}^{2+}][\text{CO}_3^{2-}]$  and  $K_{\text{sp}} = 3.13 \text{ E-11}$

then  $3.13 \text{ E-11} = [\text{Fe}^{2+}][\text{CO}_3^{2-}]$

$$3.13 \text{ E-11} = (1)[\text{CO}_3^{2-}]$$

$$3.13 \text{ E-11} = [\text{CO}_3^{2-}]$$

$$[\text{CO}_3^{2-}] = 3.13 \text{ E-11 M}$$

and for  $\text{BaCO}_3 \leftrightarrow \text{Ba}^{2+} + \text{CO}_3^{2-}$  where  $K_{\text{sp}} = [\text{Ba}^{2+}][\text{CO}_3^{2-}]$  and  $K_{\text{sp}} = 2.58 \text{ E-9}$

then  $2.58 \text{ E-9} = [\text{Ba}^{2+}][\text{CO}_3^{2-}]$

$$2.58 \text{ E-9} = (1)[\text{CO}_3^{2-}]$$

$$2.58 \text{ E-9} = [\text{CO}_3^{2-}]$$

$$[\text{CO}_3^{2-}] = 2.58 \text{ E-9 M}$$

The selectivity of calcium, iron, and barium for phosphate over carbonate can be calculated as follows:

Selectivity (S) =  $[\text{CO}_3^{2-}] / [\text{PO}_4^{3-}]$  where  $[\text{PO}_4^{3-}]$  and  $[\text{CO}_3^{2-}]$  are the concentrations calculated above which represent the concentrations required for precipitation or complexation as a salt when the metal is assumed to be present at 1 M for normalized comparison.

$$S_{\text{calcium}} = 3.36 \text{ E-9} / 4.5 \text{ E-17}$$

$$= 7.5 \text{ E7}$$

$$S_{\text{iron}} = 3.13 \text{ E-11} / 9.91 \text{ E-16}$$

$$= 3.16 \text{ E4}$$

$$S_{\text{barium}} = 2.58 \text{ E-9} / 3.4 \text{ E-23}$$

$$= 7.6 \text{ E13}$$

Thus, a phosphopeptide should bind hydroxyapatite nearly 100 million times more tightly than an unmodified peptide. Similarly, a phosphopeptide should bind a barium chromatograph resin nearly 100 trillion times more tightly than an unmodified peptide.

# HAP Serine Motifs

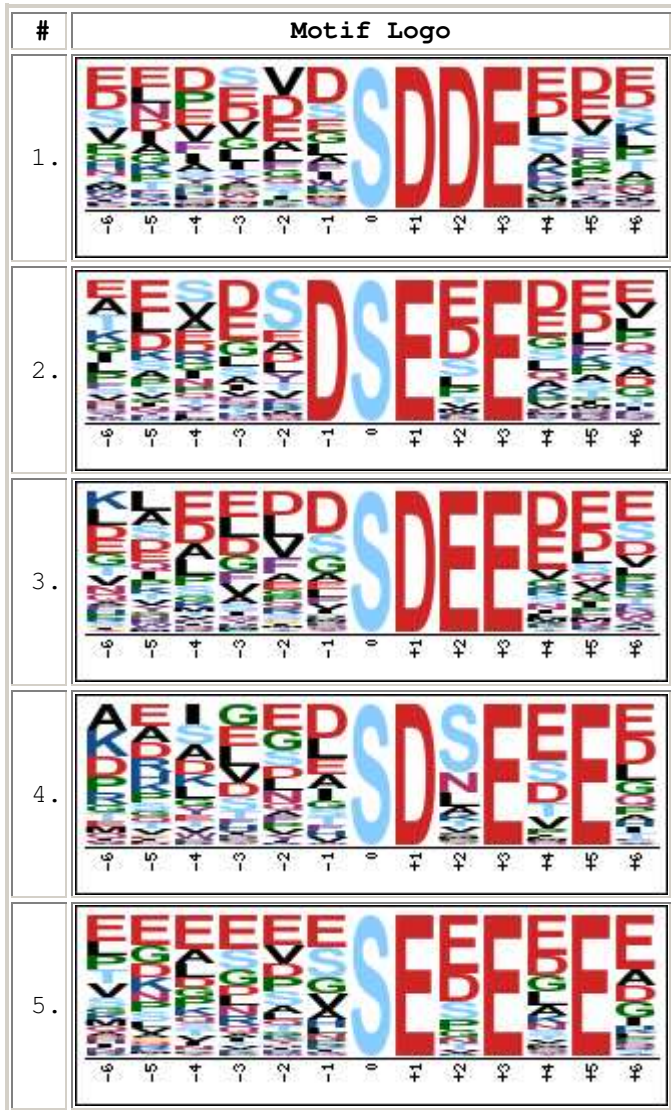

| #   | Motif                 | Motif Score | Foreground Matches | Foreground Size | Background Matches | Background Size | Fold Increase |
|-----|-----------------------|-------------|--------------------|-----------------|--------------------|-----------------|---------------|
| 1.  | <u>.....sDDE...</u>   | 44.36       | 59                 | 2342            | 340                | 1078751         | 79.93         |
| 2.  | <u>.....DsE.E...</u>  | 44.69       | 59                 | 2283            | 591                | 1078411         | 47.16         |
| 3.  | <u>.....sDEE...</u>   | 41.25       | 66                 | 2224            | 580                | 1077820         | 55.15         |
| 4.  | <u>.....sD.E.E.</u>   | 47.65       | 46                 | 2158            | 448                | 1077240         | 51.26         |
| 5.  | <u>.....sE.E.E.</u>   | 43.10       | 58                 | 2112            | 801                | 1076792         | 36.92         |
| 6.  | <u>.....sP..E..</u>   | 30.91       | 76                 | 2054            | 4295               | 1075991         | 9.27          |
| 7.  | <u>.....s.DEE..</u>   | 44.79       | 30                 | 1978            | 344                | 1071696         | 47.25         |
| 8.  | <u>.....sD.E...</u>   | 32.00       | 111                | 1948            | 3209               | 1071352         | 19.02         |
| 9.  | <u>.....sPE....</u>   | 27.20       | 71                 | 1837            | 5168               | 1068143         | 7.99          |
| 10. | <u>.....DsD.D...</u>  | 44.94       | 50                 | 1766            | 412                | 1062975         | 73.05         |
| 11. | <u>.....P.sP.....</u> | 25.07       | 79                 | 1716            | 7682               | 1062563         | 6.37          |
| 12. | <u>.....sE.E.D.</u>   | 39.16       | 24                 | 1637            | 343                | 1054881         | 45.09         |
| 13. | <u>.....sDED...</u>   | 41.88       | 32                 | 1613            | 326                | 1054538         | 64.17         |
| 14. | <u>.....sE.E...</u>   | 32.00       | 74                 | 1581            | 4484               | 1054212         | 11.00         |
| 15. | <u>.....s.DDE..</u>   | 38.35       | 20                 | 1507            | 215                | 1049728         | 64.80         |
| 16. | <u>.....sP.....</u>   | 16.00       | 266                | 1487            | 60203              | 1049513         | 3.12          |
| 17. | <u>.....s.D.D..</u>   | 32.00       | 56                 | 1221            | 2758               | 989310          | 16.45         |
| 18. | <u>.....sE.D...</u>   | 32.00       | 61                 | 1165            | 3358               | 986552          | 15.38         |
| 19. | <u>.....Ds...E..</u>  | 31.95       | 48                 | 1104            | 3413               | 983194          | 12.52         |
| 20. | <u>.....s.E..E.</u>   | 25.27       | 42                 | 1056            | 4814               | 979781          | 8.09          |
| 21. | <u>.....s.DE...</u>   | 26.43       | 31                 | 1014            | 2017               | 974967          | 14.78         |
| 22. | <u>.....s...E.D</u>   | 28.95       | 34                 | 983             | 2739               | 972950          | 12.29         |
| 23. | <u>.....sD.D...</u>   | 32.00       | 47                 | 949             | 2604               | 970211          | 18.45         |
| 24. | <u>.....s.E..D.</u>   | 24.33       | 28                 | 902             | 3156               | 967607          | 9.52          |
| 25. | <u>...D..sD.....</u>  | 24.61       | 25                 | 874             | 2045               | 964451          | 13.49         |
| 26. | <u>.....s...E.E</u>   | 28.91       | 38                 | 849             | 4597               | 962406          | 9.37          |
| 27. | <u>.....s...D.D</u>   | 23.00       | 24                 | 811             | 2368               | 957809          | 11.97         |
| 28. | <u>.....s.D..D.</u>   | 23.81       | 22                 | 787             | 2018               | 955441          | 13.24         |



12.

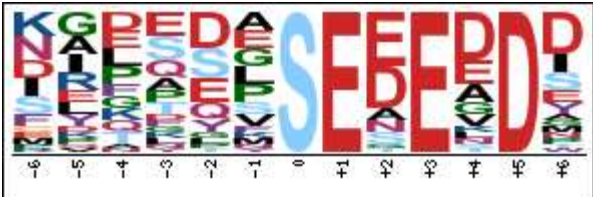

13.

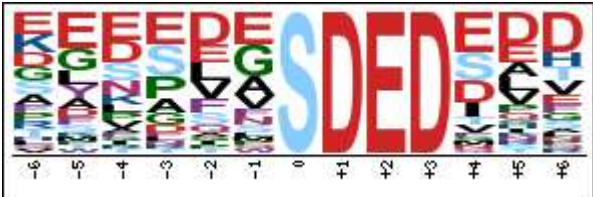

14.

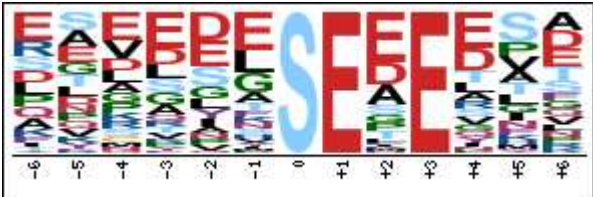

15.

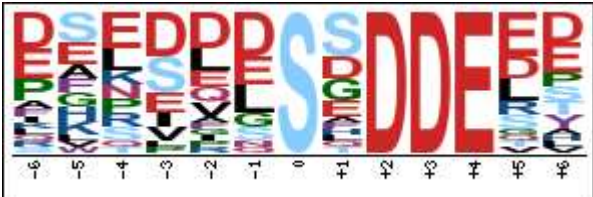

16.

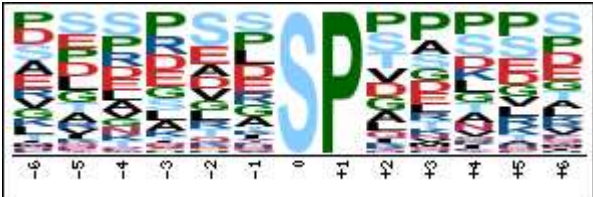

17.

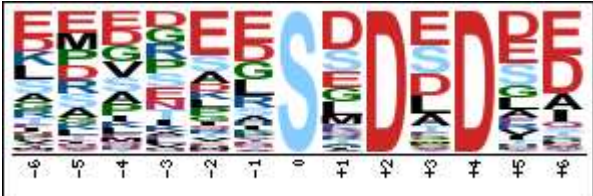





24.

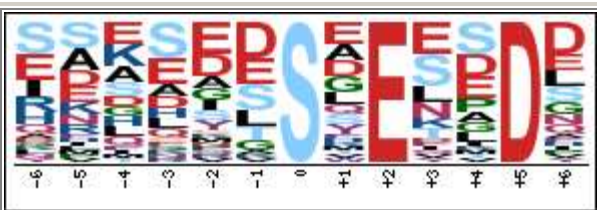

25.

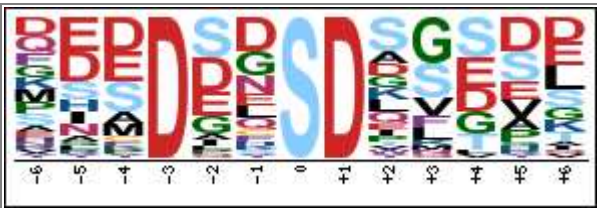

26.

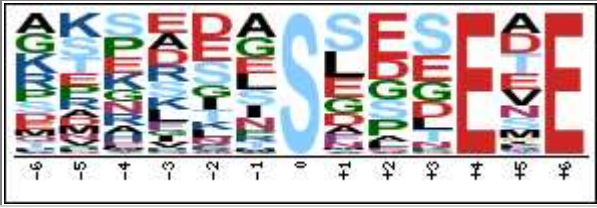

27.

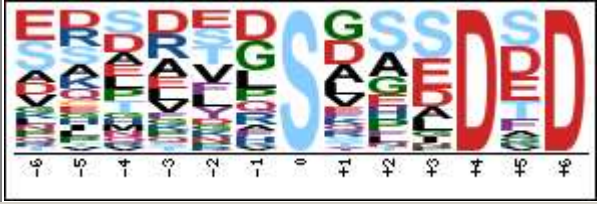

28.

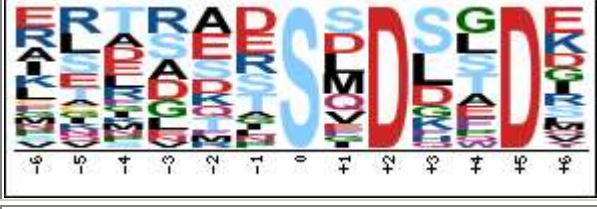

29.

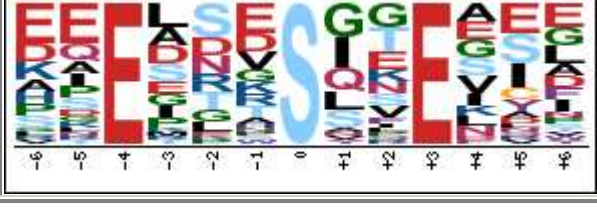



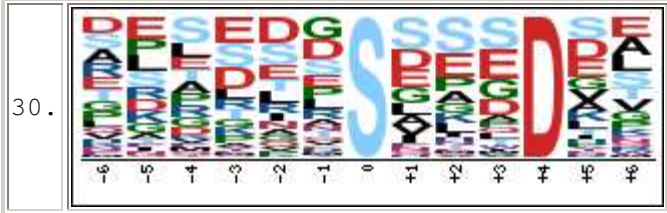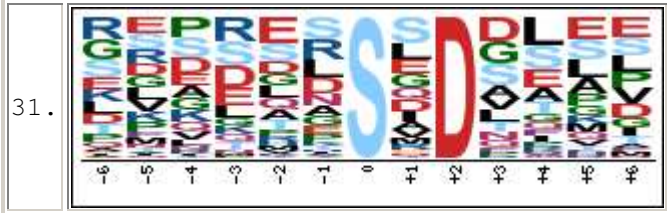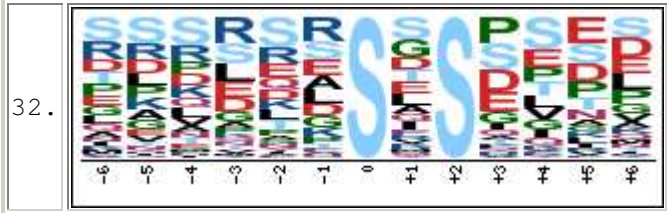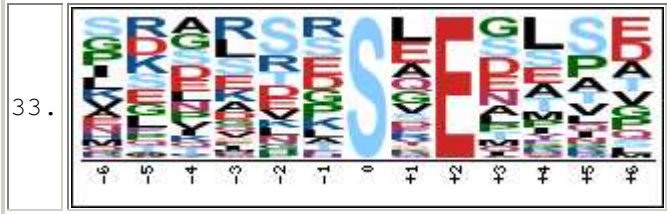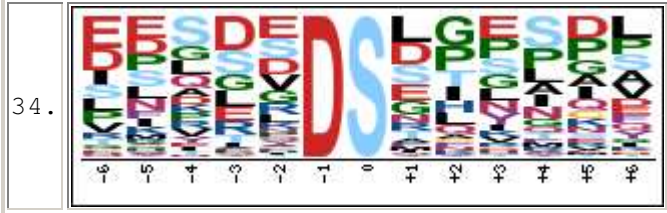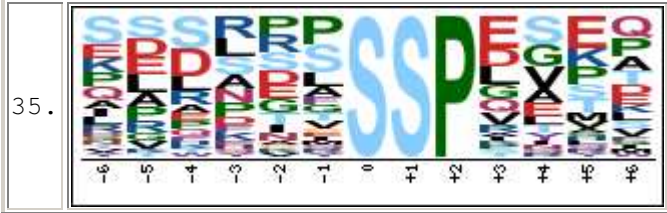

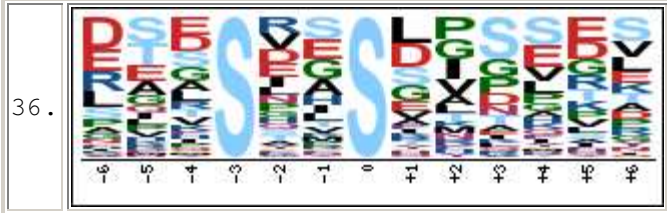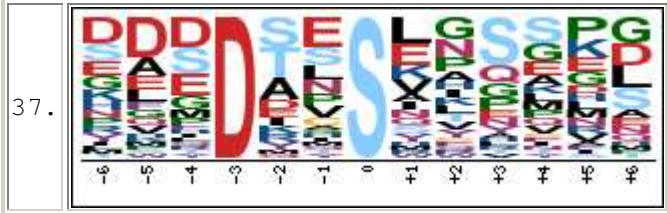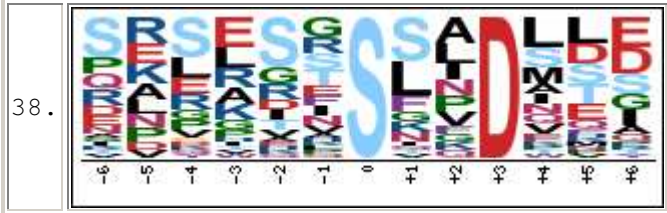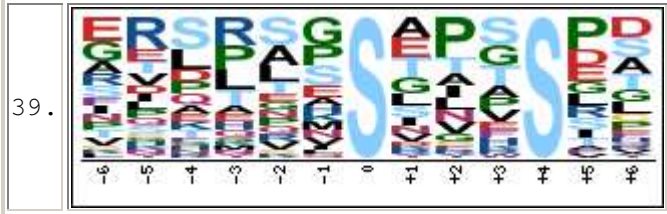

# HAP Threonine Motifs

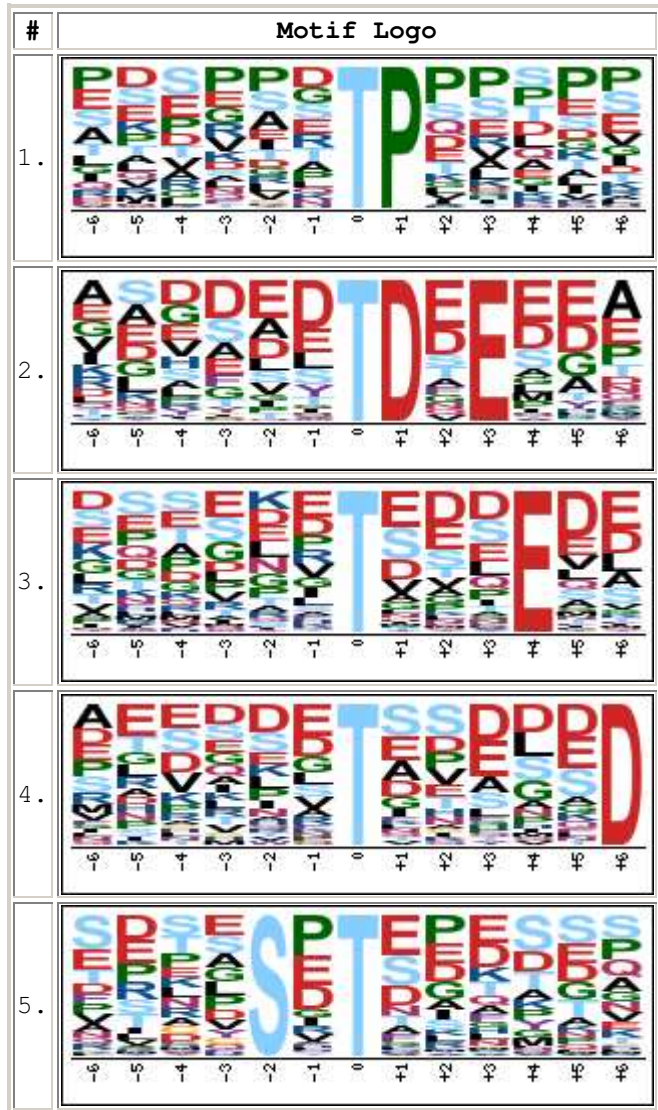

| #  | Motif                        | Motif Score | Foreground Matches | Foreground Size | Background Matches | Background Size | Fold Increase |
|----|------------------------------|-------------|--------------------|-----------------|--------------------|-----------------|---------------|
| 1. | <a href="#">.....tP.....</a> | 16.00       | 89                 | 378             | 44989              | 683108          | 3.58          |
| 2. | <a href="#">.....tD.E...</a> | 32.00       | 38                 | 289             | 2347               | 638119          | 35.75         |
| 3. | <a href="#">.....t...E..</a> | 16.00       | 57                 | 251             | 40845              | 635772          | 3.53          |
| 4. | <a href="#">.....t.....D</a> | 11.70       | 35                 | 194             | 26510              | 594927          | 4.05          |
| 5. | <a href="#">....S.t.....</a> | 10.60       | 43                 | 159             | 50547              | 568417          | 3.04          |
| 6. | <a href="#">.....t....D.</a> | 7.33        | 21                 | 116             | 23143              | 517870          | 4.05          |

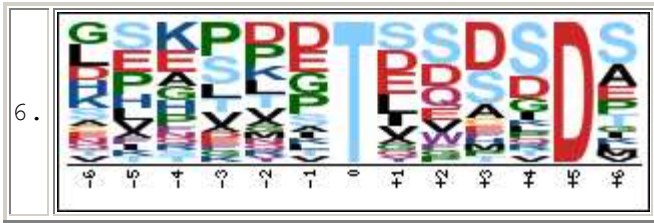

### HILIC-IMAC Serine Motifs

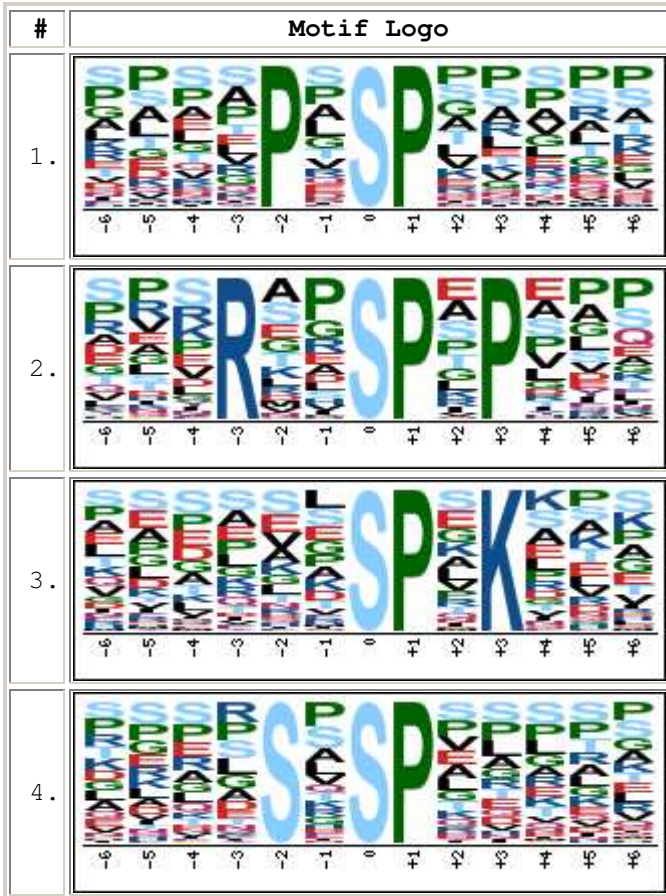

| #   | Motif                 | Motif Score | Foreground Matches | Foreground Size | Background Matches | Background Size | Fold Increase |
|-----|-----------------------|-------------|--------------------|-----------------|--------------------|-----------------|---------------|
| 1.  | <u>....P.sP.....</u>  | 32.00       | 580                | 7754            | 8594               | 1078751         | 9.39          |
| 2.  | <u>...R..sP.P...</u>  | 42.47       | 72                 | 7174            | 514                | 1070157         | 20.90         |
| 3.  | <u>.....sP.K...</u>   | 25.67       | 173                | 7102            | 3018               | 1069643         | 8.63          |
| 4.  | <u>....S.sP.....</u>  | 25.13       | 383                | 6929            | 8427               | 1066625         | 7.00          |
| 5.  | <u>.....sPP.....</u>  | 24.80       | 213                | 6546            | 4410               | 1058198         | 7.81          |
| 6.  | <u>.....sPT.....</u>  | 24.83       | 156                | 6333            | 3108               | 1053788         | 8.35          |
| 7.  | <u>...G..sP.....</u>  | 22.05       | 154                | 6177            | 3546               | 1050680         | 7.39          |
| 8.  | <u>.....sPK.....</u>  | 22.51       | 105                | 6023            | 2226               | 1047134         | 8.20          |
| 9.  | <u>.....sP...R.</u>   | 22.19       | 115                | 5918            | 2638               | 1044908         | 7.70          |
| 10. | <u>...R..sP.....</u>  | 23.37       | 106                | 5803            | 2339               | 1042270         | 8.14          |
| 11. | <u>.....sPS.....</u>  | 32.00       | 170                | 5697            | 5150               | 1039931         | 6.03          |
| 12. | <u>...RS.s.....</u>   | 32.00       | 168                | 5527            | 6844               | 1034781         | 4.60          |
| 13. | <u>...S..sP.....</u>  | 32.00       | 107                | 5359            | 3912               | 1027937         | 5.25          |
| 14. | <u>..S...sP.....</u>  | 32.00       | 79                 | 5252            | 3137               | 1024025         | 4.91          |
| 15. | <u>.....Rs.SP...</u>  | 39.37       | 31                 | 5173            | 585                | 1020888         | 10.46         |
| 16. | <u>...R..s..S...</u>  | 32.00       | 103                | 5142            | 5569               | 1020303         | 3.67          |
| 17. | <u>....SPs.....</u>   | 32.00       | 155                | 5039            | 7187               | 1014734         | 4.34          |
| 18. | <u>.....sD.E...</u>   | 32.00       | 196                | 4884            | 4531               | 1007547         | 8.92          |
| 19. | <u>.....PsSP.....</u> | 39.56       | 53                 | 4688            | 926                | 1003016         | 12.25         |
| 20. | <u>...R..s.S...</u>   | 32.00       | 91                 | 4635            | 4844               | 1002090         | 4.06          |
| 21. | <u>...SP.s.....</u>   | 27.10       | 99                 | 4544            | 7638               | 997246          | 2.84          |
| 22. | <u>.....sP.....</u>   | 16.00       | 605                | 4445            | 26329              | 989608          | 5.12          |



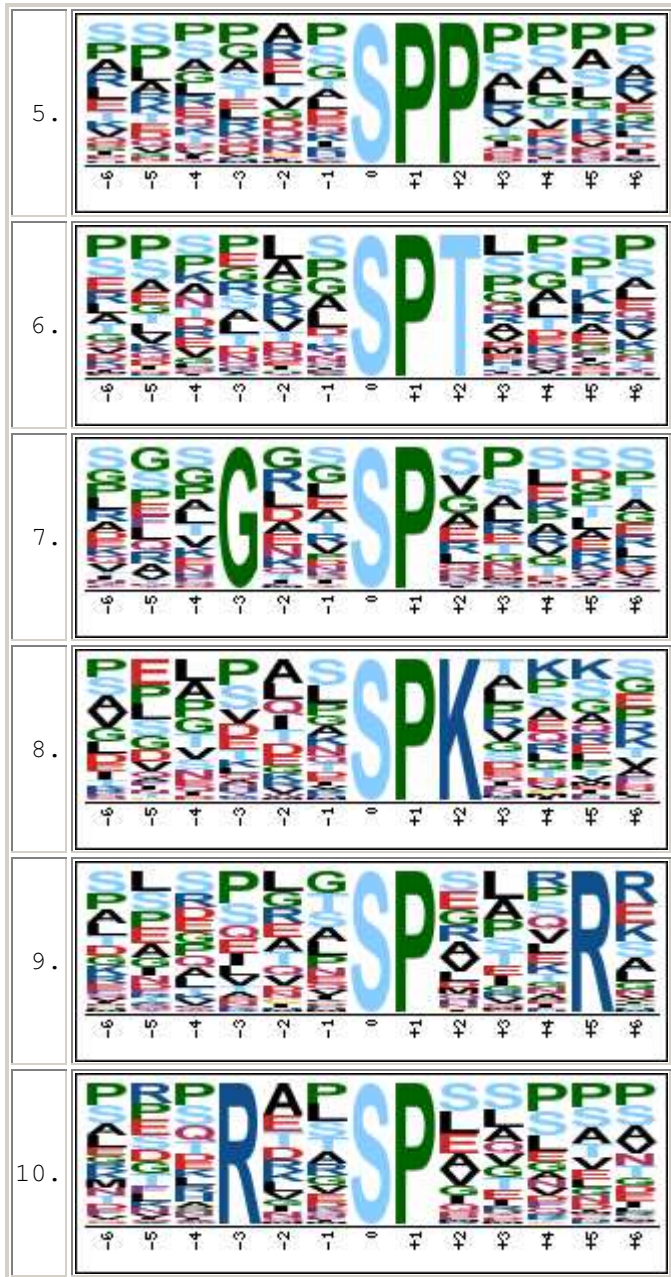

|     |                      |       |     |      |       |        |       |
|-----|----------------------|-------|-----|------|-------|--------|-------|
| 23. | <u>.....sSP....</u>  | 32.00 | 171 | 3840 | 7692  | 963279 | 5.58  |
| 24. | <u>..SP..s.....</u>  | 23.78 | 81  | 3669 | 7399  | 955587 | 2.85  |
| 25. | <u>..R..S.s.....</u> | 23.96 | 68  | 3588 | 5403  | 948188 | 3.33  |
| 26. | <u>.....s.SP....</u> | 26.29 | 77  | 3520 | 6194  | 942785 | 3.33  |
| 27. | <u>R..S..s.....</u>  | 26.14 | 71  | 3443 | 5796  | 936591 | 3.33  |
| 28. | <u>....SDsE.....</u> | 30.82 | 24  | 3372 | 663   | 930795 | 9.99  |
| 29. | <u>.....sEEE....</u> | 40.26 | 52  | 3348 | 1047  | 930132 | 13.80 |
| 30. | <u>.....s.DE....</u> | 32.00 | 73  | 3296 | 2928  | 929085 | 7.03  |
| 31. | <u>.....s.ED....</u> | 29.16 | 73  | 3223 | 4373  | 926157 | 4.80  |
| 32. | <u>.....s..SP..</u>  | 22.64 | 63  | 3150 | 6330  | 921784 | 2.91  |
| 33. | <u>...RR.s.....</u>  | 29.09 | 78  | 3087 | 3620  | 915454 | 6.39  |
| 34. | <u>.....s...SP.</u>  | 28.10 | 80  | 3009 | 6990  | 911834 | 3.47  |
| 35. | <u>..R.R..s.....</u> | 28.06 | 57  | 2929 | 2727  | 904844 | 6.46  |
| 36. | <u>.....sD.D....</u> | 27.96 | 52  | 2872 | 2850  | 902117 | 5.73  |
| 37. | <u>.....s.D....</u>  | 16.00 | 233 | 2820 | 40079 | 899267 | 1.85  |
| 38. | <u>....Rs.S....</u>  | 25.21 | 56  | 2587 | 4903  | 859188 | 3.79  |
| 39. | <u>.....s..E.E.</u>  | 26.54 | 62  | 2531 | 4875  | 854285 | 4.29  |
| 40. | <u>.....s.E....</u>  | 16.00 | 260 | 2469 | 52209 | 849410 | 1.71  |
| 41. | <u>....Gs.....</u>   | 15.35 | 263 | 2209 | 56624 | 797201 | 1.68  |
| 42. | <u>....PsTP....</u>  | 35.84 | 23  | 1946 | 390   | 740577 | 22.44 |
| 43. | <u>...R..s.P....</u> | 19.46 | 29  | 1923 | 2096  | 740187 | 5.33  |
| 44. | <u>.SP...s.....</u>  | 20.64 | 49  | 1894 | 5361  | 738091 | 3.56  |
| 45. | <u>..S...s.....</u>  | 12.23 | 278 | 1845 | 71718 | 732730 | 1.54  |
| 46. | <u>..R...s.....</u>  | 9.53  | 159 | 1567 | 40036 | 661012 | 1.68  |
| 47. | <u>.....s..D....</u> | 7.99  | 113 | 1408 | 28342 | 620976 | 1.76  |
| 48. | <u>.....s..E....</u> | 7.78  | 130 | 1295 | 35759 | 592634 | 1.66  |
| 49. | <u>.....s.TP....</u> | 15.69 | 30  | 1165 | 2808  | 556875 | 5.11  |
| 50. | <u>.....s..S....</u> | 7.84  | 181 | 1135 | 58327 | 554067 | 1.51  |
| 51. | <u>....R.s.....</u>  | 6.31  | 84  | 954  | 24651 | 495740 | 1.77  |



11.

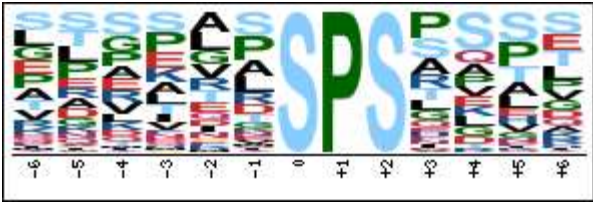

12.

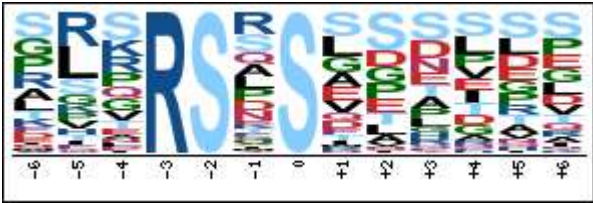

13.

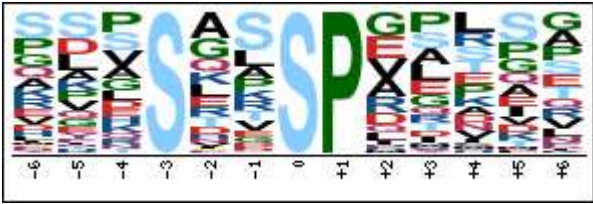

14.

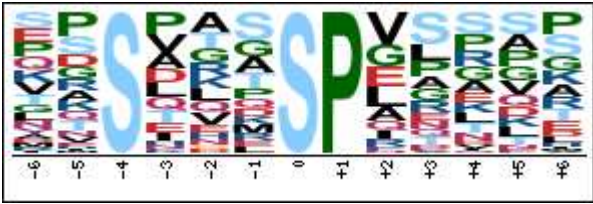

15.

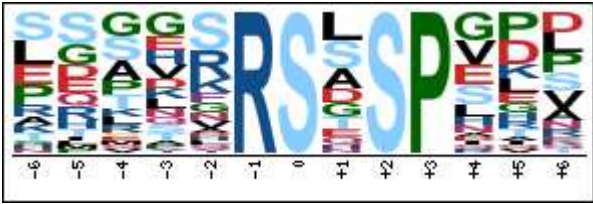

16.

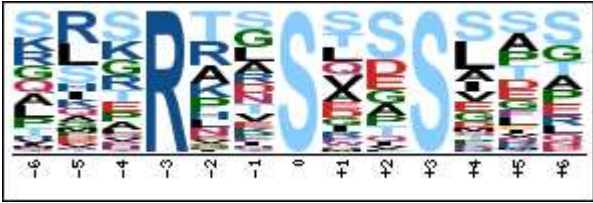

17.

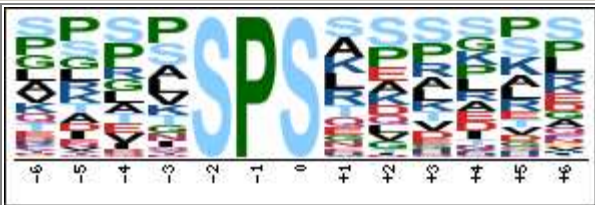

18.

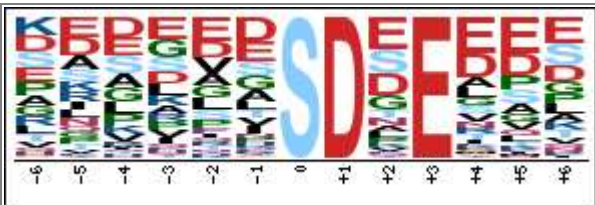

19.

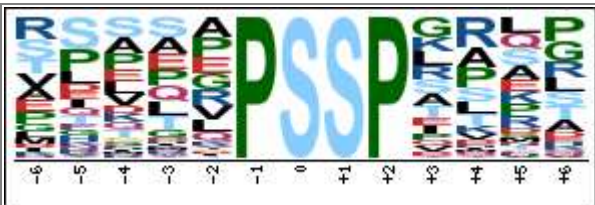

20.

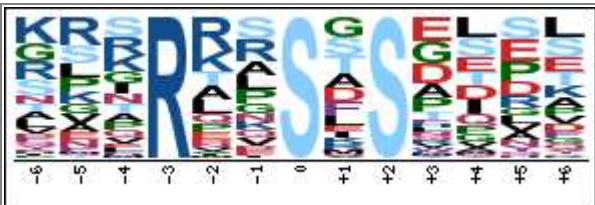

21.

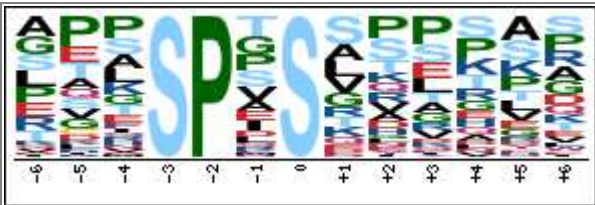

22.

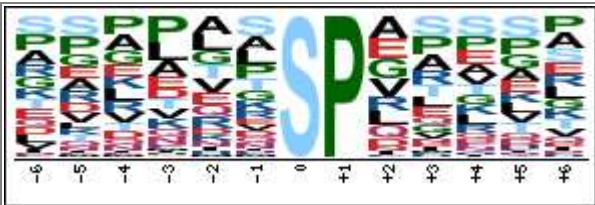

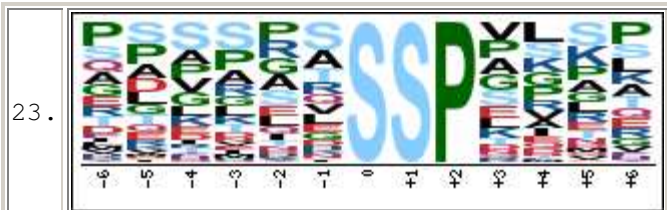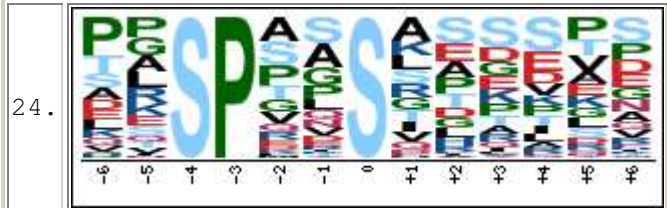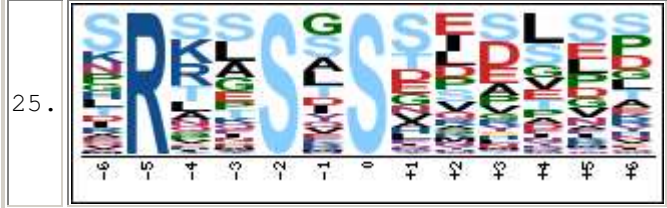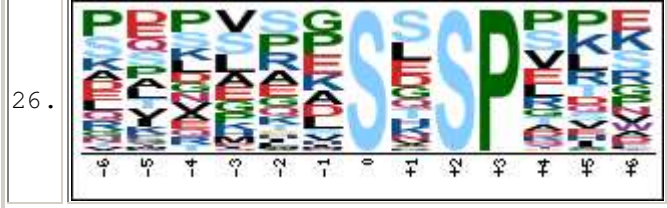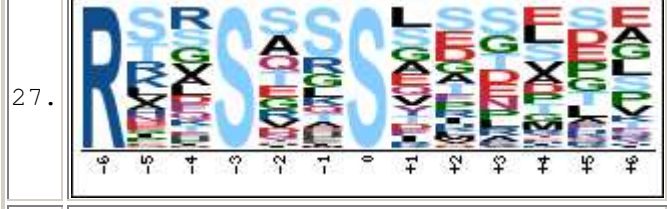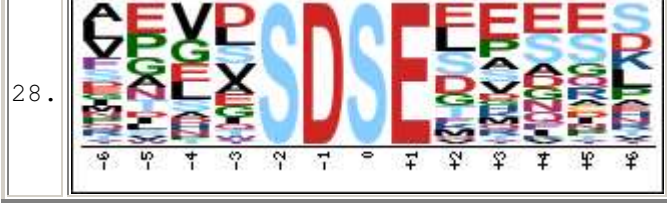



29.

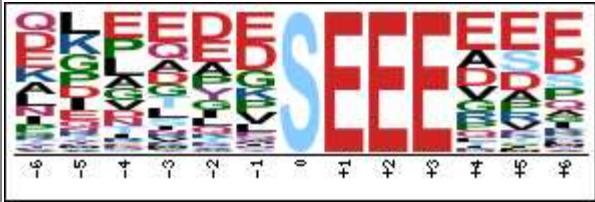

30.

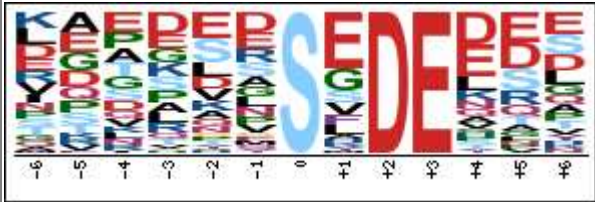

31.

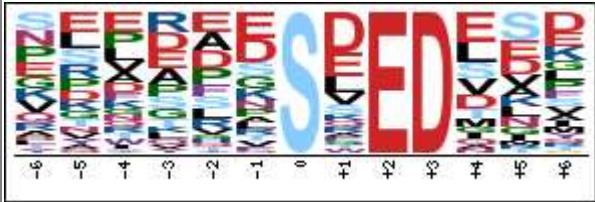

32.

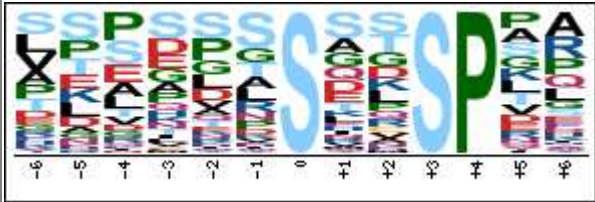

33.

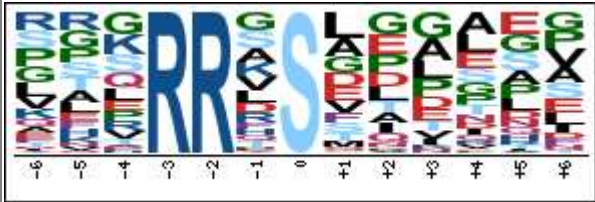

34.

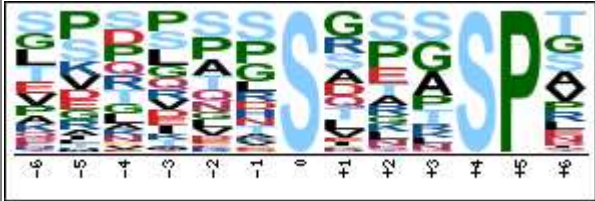

35.

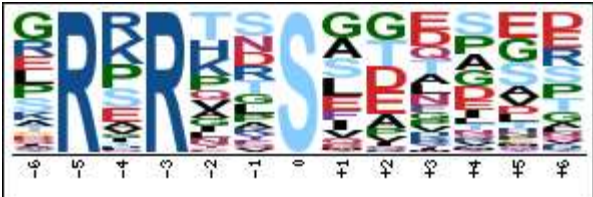

36.

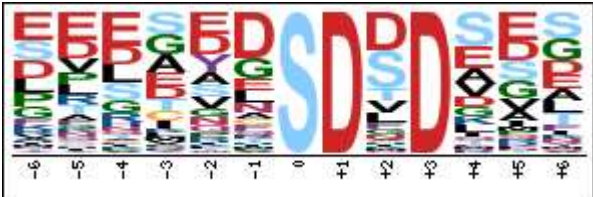

37.

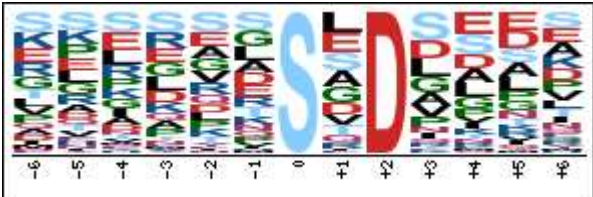

38.

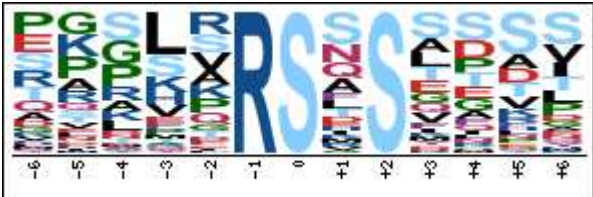

39.

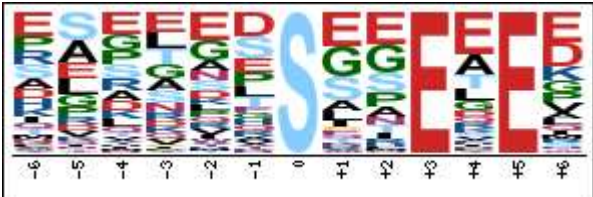

40.

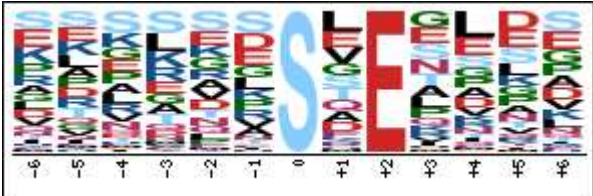



41.

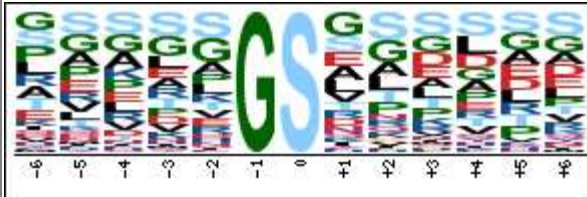

42.

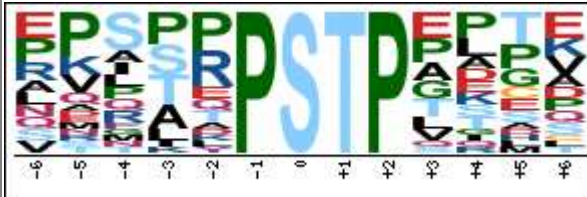

43.

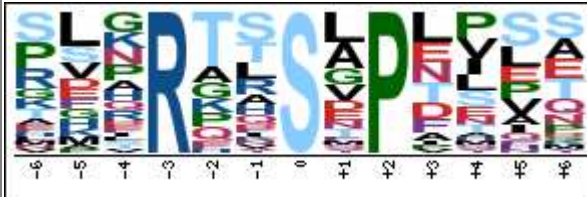

44.

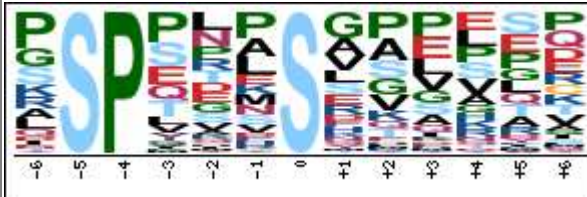

45.

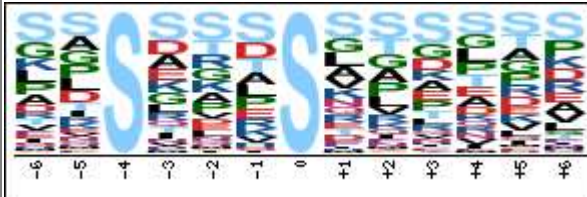

46.

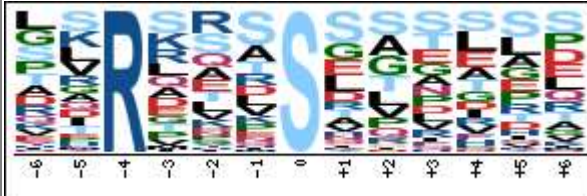

47.

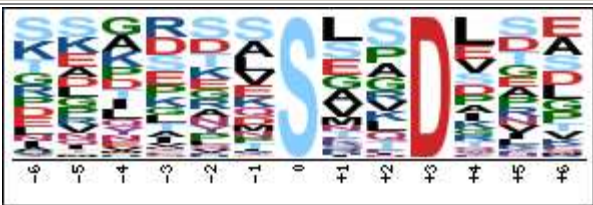

48.

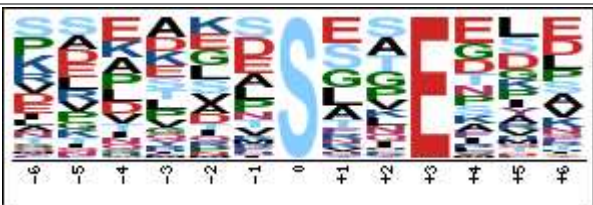

49.

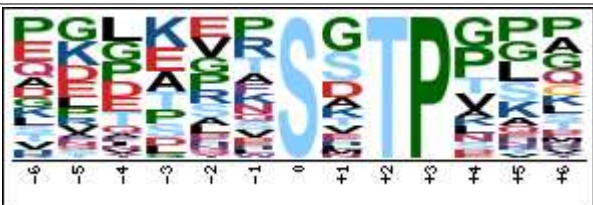

50.

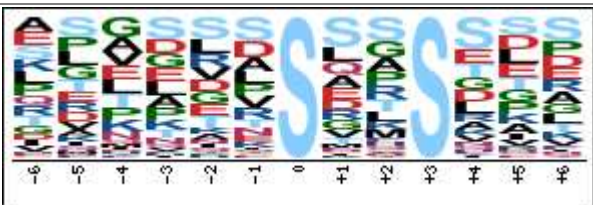

51.

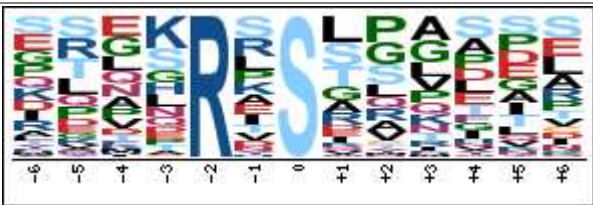

# HILIC-IMAC Threonine Motifs

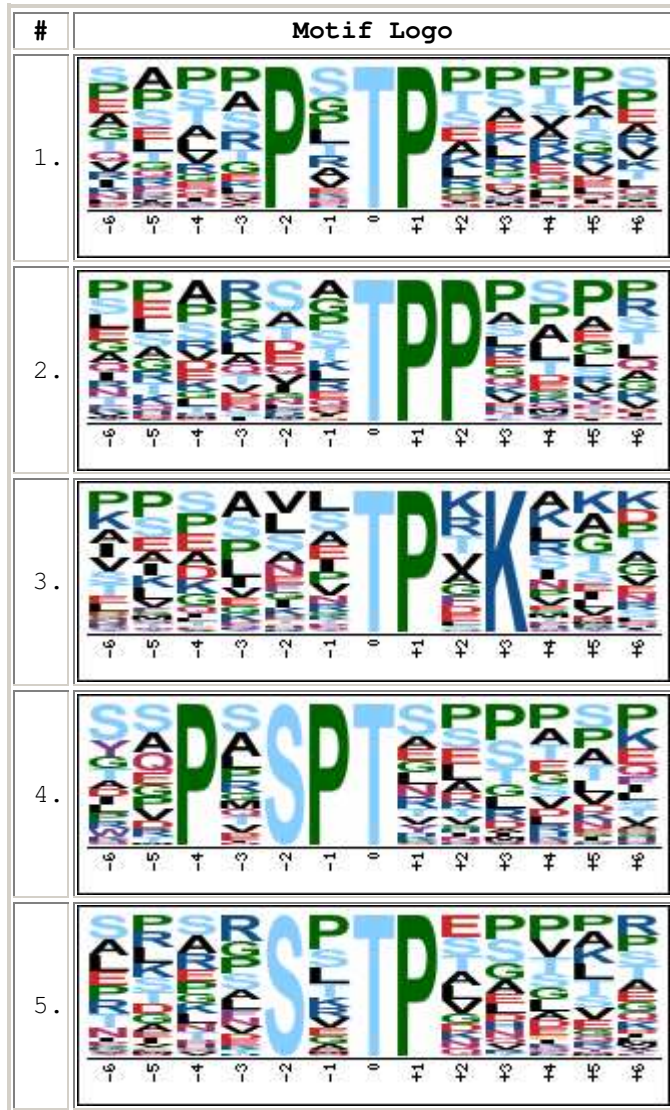

| #   | Motif                | Motif Score | Foreground Matches | Foreground Size | Background Matches | Background Size | Fold Increase |
|-----|----------------------|-------------|--------------------|-----------------|--------------------|-----------------|---------------|
| 1.  | <u>....P.tP.....</u> | 32.00       | 181                | 2146            | 4807               | 683108          | 11.99         |
| 2.  | <u>.....tPP....</u>  | 32.00       | 113                | 1965            | 3182               | 678301          | 12.26         |
| 3.  | <u>.....tP.K...</u>  | 24.71       | 52                 | 1852            | 1866               | 675119          | 10.16         |
| 4.  | <u>..P.SPt.....</u>  | 38.59       | 36                 | 1800            | 511                | 673253          | 26.35         |
| 5.  | <u>....S.tP.....</u> | 24.75       | 79                 | 1764            | 3857               | 672742          | 7.81          |
| 6.  | <u>.....tSP....</u>  | 32.00       | 109                | 1685            | 4382               | 668885          | 9.87          |
| 7.  | <u>.....tP.P...</u>  | 22.71       | 55                 | 1576            | 2959               | 664503          | 7.84          |
| 8.  | <u>....SPt.....</u>  | 32.00       | 65                 | 1521            | 3317               | 661544          | 8.52          |
| 9.  | <u>.....Rt.S....</u> | 29.92       | 49                 | 1456            | 3555               | 658227          | 6.23          |
| 10. | <u>.....tP.....</u>  | 16.00       | 223                | 1407            | 28097              | 654672          | 3.69          |
| 11. | <u>...SP.t.....</u>  | 25.43       | 41                 | 1184            | 3906               | 626575          | 5.55          |
| 12. | <u>....R.tS.....</u> | 23.19       | 30                 | 1143            | 2712               | 622669          | 6.03          |
| 13. | <u>....S.t.....</u>  | 14.75       | 174                | 1113            | 51862              | 619957          | 1.87          |
| 14. | <u>.....t.SP...</u>  | 21.56       | 37                 | 939             | 3396               | 568095          | 6.59          |
| 15. | <u>..S...t.....</u>  | 8.17        | 131                | 902             | 49119              | 564699          | 1.67          |
| 16. | <u>.....St.....</u>  | 6.34        | 103                | 771             | 41683              | 515580          | 1.65          |



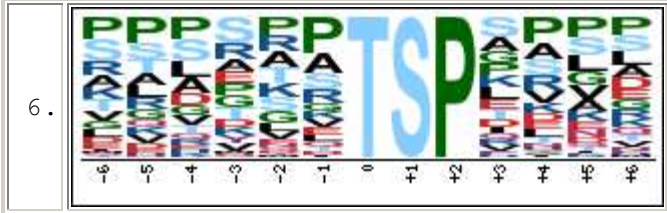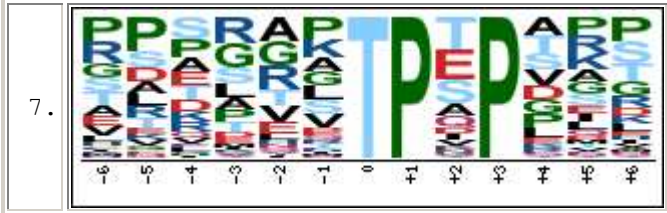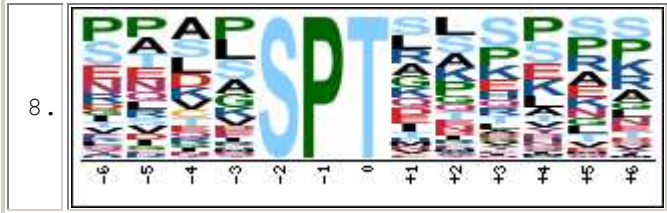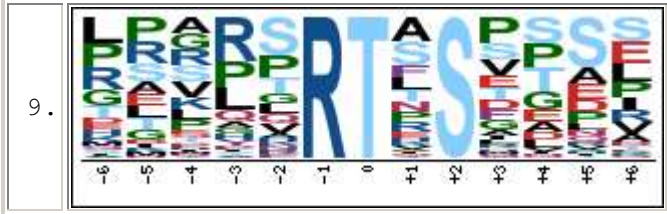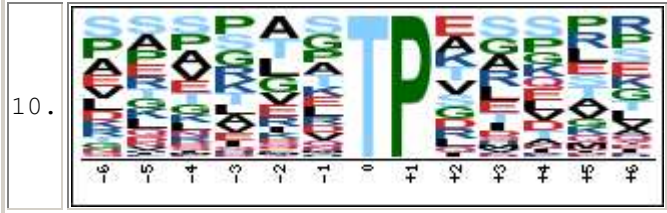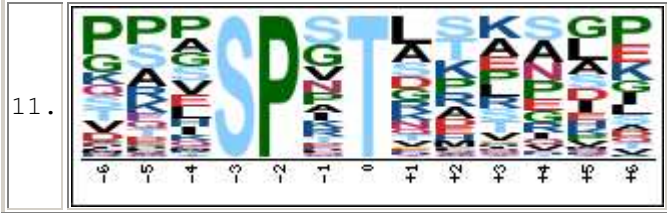

12.

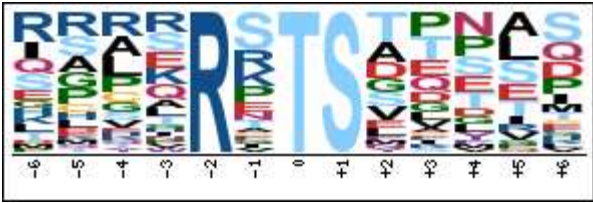

13.

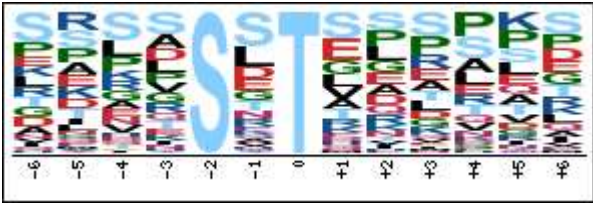

14.

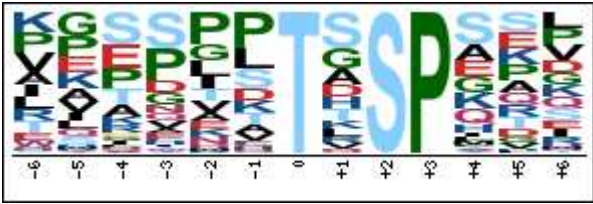

15.

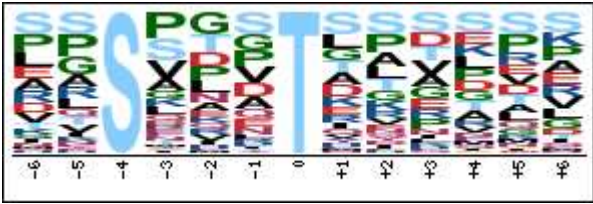

16.

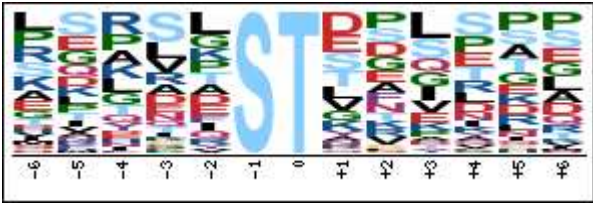

Supplement: NIHMS371404-supplement-1_si_001.pdf [file NIHMS371404-supplement-1_si_001.pdf]
